# Supplementary material
Source: HighWire-hosted journal article supplement (https://bmjopen.bmj.com/content/8/6/e020818)
Supplement: inline-supplementary-material-1 [file inline-supplementary-material-1.pdf]

## APPENDIX 1: Research fields included in our analysis

| WoS research field               | Total number of publications in study period | % of publications assigned to a diagnosis |
|----------------------------------|----------------------------------------------|-------------------------------------------|
| ALLERGY                          | 16183                                        | 88%                                       |
| RHEUMATOLOGY                     | 49182                                        | 87%                                       |
| TROPICAL MEDICINE                | 15421                                        | 85%                                       |
| OBSTETRICS & GYNECOLOGY          | 88851                                        | 83%                                       |
| INFECTIOUS DISEASES              | 70945                                        | 82%                                       |
| CARDIAC & CARDIOVASCULAR SYSTEMS | 152218                                       | 81%                                       |
| CLINICAL NEUROLOGY               | 156405                                       | 81%                                       |
| UROLOGY & NEPHROLOGY             | 113375                                       | 80%                                       |
| GASTROENTEROLOGY & HEPATOLOGY    | 112952                                       | 79%                                       |
| VIROLOGY                         | 58123                                        | 78%                                       |
| RESPIRATORY SYSTEM               | 56867                                        | 78%                                       |
| ONCOLOGY                         | 261038                                       | 77%                                       |
| PERIPHERAL VASCULAR DISEASE      | 77053                                        | 76%                                       |
| PATHOLOGY                        | 61842                                        | 76%                                       |
| PSYCHIATRY                       | 103533                                       | 75%                                       |
| DERMATOLOGY                      | 65094                                        | 75%                                       |
| PEDIATRICS                       | 109175                                       | 75%                                       |
| OPHTHALMOLOGY                    | 87449                                        | 74%                                       |
| OTORHINOLARYNGOLOGY              | 46286                                        | 73%                                       |
| TRANSPLANTATION                  | 25873                                        | 72%                                       |
| ENDOCRINOLOGY & METABOLISM       | 144658                                       | 71%                                       |
| MEDICINE, GENERAL & INTERNAL     | 208138                                       | 71%                                       |
| SURGERY                          | 238955                                       | 70%                                       |
| CRITICAL CARE MEDICINE           | 32027                                        | 69%                                       |
| HEMATOLOGY                       | 87966                                        | 69%                                       |

|                                               |        |     |
|-----------------------------------------------|--------|-----|
| REPRODUCTIVE BIOLOGY                          | 28696  | 67% |
| ANDROLOGY                                     | 4659   | 67% |
| ORTHOPEDECS                                   | 61249  | 65% |
| MEDICINE, RESEARCH & EXPERIMENTAL             | 106955 | 64% |
| IMMUNOLOGY                                    | 152354 | 64% |
| EMERGENCY MEDICINE                            | 23264  | 64% |
| MEDICAL LABORATORY TECHNOLOGY                 | 27827  | 64% |
| PARASITOLOGY                                  | 34936  | 62% |
| GERIATRICS & GERONTOLOGY                      | 26481  | 60% |
| NUTRITION & DIETETICS                         | 69840  | 55% |
| PUBLIC, ENVIRONMENTAL & OCCUPATIONAL HEALTH   | 149568 | 55% |
| SUBSTANCE ABUSE                               | 20292  | 55% |
| PSYCHOLOGY, CLINICAL                          | 42142  | 55% |
| PRIMARY HEALTH CARE                           | 7291   | 55% |
| RADIOLOGY, NUCLEAR MEDICINE & MEDICAL IMAGING | 139186 | 54% |
| REHABILITATION                                | 37983  | 52% |
| PHARMACOLOGY & PHARMACY                       | 262881 | 51% |
| ANESTHESIOLOGY                                | 40227  | 50% |
| NEUROSCIENCES                                 | 260468 | 50% |
| SOCIAL SCIENCES, BIOMEDICAL                   | 10847  |     |
| TOXICOLOGY                                    | 63389  | 46% |
| NEUROIMAGING                                  | 9306   | 45% |
| DENTISTRY/ORAL SURGERY & MEDICINE             | 79848  | 45% |
| MICROBIOLOGY                                  | 146992 | 42% |
| GERONTOLOGY                                   | 14255  | 42% |
| MEDICINE, LEGAL                               | 13686  | 41% |
| GENETICS & HEREDITY                           | 133550 | 41% |

|                                          |        |     |
|------------------------------------------|--------|-----|
| PHYSIOLOGY                               | 73414  | 41% |
| EDUCATION, SPECIAL                       | 6912   | 40% |
| NURSING                                  | 46557  | 39% |
| PSYCHOLOGY, DEVELOPMENTAL                | 28239  | 39% |
| HEALTH CARE SCIENCES & SERVICES          | 38599  | 38% |
| SPORT SCIENCES                           | 52785  | 37% |
| HEALTH POLICY & SERVICES                 | 21533  | 36% |
| ENGINEERING, BIOMEDICAL                  | 50234  | 36% |
| BEHAVIORAL SCIENCES                      | 25766  | 36% |
| CELL BIOLOGY                             | 170382 | 36% |
| ANATOMY & MORPHOLOGY                     | 15014  | 34% |
| CELL & TISSUE ENGINEERING                | 6192   | 32% |
| PSYCHOLOGY, MULTIDISCIPLINARY            | 94172  | 31% |
| MULTIDISCIPLINARY SCIENCES               | 232494 | 31% |
| AUDIOLOGY & SPEECH-LANGUAGE<br>PATHOLOGY | 10072  | 31% |
| DEVELOPMENTAL BIOLOGY                    | 33875  | 31% |
| PSYCHOLOGY, BIOLOGICAL                   | 4084   | 30% |
| MEDICAL INFORMATICS                      | 9416   | 30% |
| BIOCHEMISTRY & MOLECULAR BIOLOGY         | 408812 | 29% |
| BIOPHYSICS                               | 75287  | 27% |
| MEDICAL ETHICS                           | 2301   | 27% |
| MATERIALS SCIENCE, BIOMATERIALS          | 24478  | 24% |
| BIOCHEMICAL RESEARCH METHODS             | 79569  | 21% |
| PSYCHOLOGY, PSYCHOANALYSIS               | 5662   | 20% |
| ACOUSTICS                                | 25576  | 18% |
| MATHEMATICAL & COMPUTATIONAL<br>BIOLOGY  | 22087  | 18% |
| MICROSCOPY                               | 10412  | 17% |

|                                    |       |     |
|------------------------------------|-------|-----|
| SOCIAL SCIENCES, INTERDISCIPLINARY | 24327 | 14% |
| PSYCHOLOGY, EXPERIMENTAL           | 33736 | 13% |
| SOCIAL ISSUES                      | 9151  | 12% |
| ETHICS                             | 8254  | 10% |
| EDUCATION, SCIENTIFIC DISCIPLINES  | 17290 | 8%  |
